# Supplementary material for: Hate Speech Detection in Roman Urdu English Tweets Through Data Pre-processing
Source: Research Square preprint supplement (doi:10.21203/rs.3.rs-6345769/v1), 2025-05-07
Supplement: Supplementary file 1 [file 3a4a34f536d1bcc6ddc789b5.docx]

https://github.com/jazibenazar-1/Hate-Speech-Detection/tree/main/Res%20Data
